# Supplementary material for: Evaluating the implementation of interdisciplinary patient-centred care intervention for people with multimorbidity in primary care: a qualitative study
Source: PubMed Central journal article supplement — BMJ Open. 2021 Sep 24;11(9):e046914. doi: 10.1136/bmjopen-2020-046914 (PMC8475135; doi:10.1136/bmjopen-2020-046914), 2021-09-24
Supplement: bmjopen-2020-046914supp002.pdf [file bmjopen-2020-046914supp002.pdf]

## Appendix S2. Consolidated criteria for reporting qualitative studies (COREQ): 32-item checklist

| No                                             | Item                    | Guide questions/description                                 |                                                                                                      |
|------------------------------------------------|-------------------------|-------------------------------------------------------------|------------------------------------------------------------------------------------------------------|
| <b>Domain 1: Research team and reflexivity</b> |                         |                                                             |                                                                                                      |
| Personal Characteristics                       |                         |                                                             |                                                                                                      |
| 1.                                             | Interviewer/facilitator | Which author/s conducted the interview or focus group?      | None, but one author (MF) supervised closely the work of the professionals conducting the interviews |
| 2.                                             | Credentials             | What were the researcher's credentials? <i>E.g. PhD, MD</i> | MF : MD, MSc, CMFC(F)<br>MCC : RN, PhD<br>BBD : PhD<br>TB : MSc                                      |
| 3.                                             | Occupation              | What was their occupation at the time of the study?         | MF : Researcher<br>MCC : Researcher<br>BBD : Research assistant<br>TB : Research coordinator         |
| 4.                                             | Gender                  | Was the researcher male or female?                          | MF : Male<br>MCC : Female                                                                            |

| No                             | Item                                     | Guide questions/description                                                                                                                      |                                                                                                                                                                                                                                                                                   |
|--------------------------------|------------------------------------------|--------------------------------------------------------------------------------------------------------------------------------------------------|-----------------------------------------------------------------------------------------------------------------------------------------------------------------------------------------------------------------------------------------------------------------------------------|
| 5.                             | Experience and training                  | What experience or training did the researcher have?                                                                                             | MF : Family physician, MSC, senior researcher<br>MCC : Registered nurse, PhD and senior researcher                                                                                                                                                                                |
| Relationship with participants |                                          |                                                                                                                                                  |                                                                                                                                                                                                                                                                                   |
| 6.                             | Relationship established                 | Was a relationship established prior to study commencement?                                                                                      | No                                                                                                                                                                                                                                                                                |
| 7.                             | Participant knowledge of the interviewer | What did the participants know about the researcher? e.g. <i>personal goals, reasons for doing the research</i>                                  | The study was presented to all participants before enrollment. All participants signed a consent form.<br>The goal of the interview was explained to all participants before the interviews (page 5).                                                                             |
| 8.                             | Interviewer characteristics              | What characteristics were reported about the interviewer/facilitator? e.g. <i>Bias, assumptions, reasons and interests in the research topic</i> | Interviews were conducted by a research coordinator (TB), a PhD student (MS), a research assistant (BBD) trained in conducting qualitative interviews, and two senior researchers (MCC, MF). All of them worked with the research team since the beginning of the study. (page 5) |
| <b>Domain 2: study design</b>  |                                          |                                                                                                                                                  |                                                                                                                                                                                                                                                                                   |
| Theoretical framework          |                                          |                                                                                                                                                  |                                                                                                                                                                                                                                                                                   |
| 9.                             | Methodological orientation and Theory    | What methodological orientation was stated to underpin the study? e.g. <i>grounded theory,</i>                                                   | Descriptive qualitative approach (close to Content analysis) embedded in a randomized trial (page 4)                                                                                                                                                                              |

| No                    | Item                       | Guide questions/description                                                               |                                                                                                                        |
|-----------------------|----------------------------|-------------------------------------------------------------------------------------------|------------------------------------------------------------------------------------------------------------------------|
|                       |                            | <i>discourse analysis, ethnography, phenomenology, content analysis</i>                   |                                                                                                                        |
| Participant selection |                            |                                                                                           |                                                                                                                        |
| 10.                   | Sampling                   | How were participants selected? <i>e.g. purposive, convenience, consecutive, snowball</i> | Maximum variability was targeted based on age, gender, socio-economic status, practices (page 4).                      |
| 11.                   | Method of approach         | How were participants approached? <i>e.g. face-to-face, telephone, mail, email</i>        | The managers and healthcare professionals were contacted by phone at their working place (page 4).                     |
| 12.                   | Sample size                | How many participants were in the study?                                                  | 29 accepted to participate (page 5).<br>- 10 managers including two family physicians<br>- 19 healthcare professionals |
| 13.                   | Non-participation          | How many people refused to participate or dropped out? Reasons?                           | - All (29) participants contacted accepted to participate (page 6).<br>- No participant dropped out                    |
| Setting               |                            |                                                                                           |                                                                                                                        |
| 14.                   | Setting of data collection | Where was the data collected? <i>e.g. home, clinic, workplace</i>                         | Primary health care practices (page 4)                                                                                 |

| No              | Item                         | Guide questions/description                                                              |                                                                                                                                                                                                                                                                                       |
|-----------------|------------------------------|------------------------------------------------------------------------------------------|---------------------------------------------------------------------------------------------------------------------------------------------------------------------------------------------------------------------------------------------------------------------------------------|
| 15.             | Presence of non-participants | Was anyone else present besides the participants and researchers?                        | No                                                                                                                                                                                                                                                                                    |
| 16.             | Description of sample        | What are the important characteristics of the sample? <i>e.g. demographic data, date</i> | Managers including family physicians and healthcare professionals, nurses, kinesiologists, nutritionists and a respiratory therapist actively participated in the program or its implementation (page 4).                                                                             |
| Data collection |                              |                                                                                          |                                                                                                                                                                                                                                                                                       |
| 17.             | Interview guide              | Were questions, prompts, guides provided by the authors? Was it pilot tested?            | The interview guides included open questions relating the perceived factors influencing the implementation of intervention developed by the research team based on theoretical framework. Interviews were in French. It was pretested and adjusted accordingly (page 4, Appendix S3). |
| 18.             | Repeat interviews            | Were repeat interviews carried out? If yes, how many?                                    | Not with this design                                                                                                                                                                                                                                                                  |
| 19.             | Audio/visual recording       | Did the research use audio or visual recording to collect the data?                      | All interviews were audio-recorded (page 5)                                                                                                                                                                                                                                           |
| 20.             | Field notes                  | Were field notes made during and/or after the interview or focus group?                  | The interviewers took notes during and after the interviews (page 6).                                                                                                                                                                                                                 |
| 21.             | Duration                     | What was the duration of the interviews or focus group?                                  | Average 47 minutes (page5)                                                                                                                                                                                                                                                            |

| No                                     | Item                           | Guide questions/description                                              |                                                                                                                                                                                   |
|----------------------------------------|--------------------------------|--------------------------------------------------------------------------|-----------------------------------------------------------------------------------------------------------------------------------------------------------------------------------|
| 22.                                    | Data saturation                | Was data saturation discussed?                                           | Yes                                                                                                                                                                               |
| 23.                                    | Transcripts returned           | Were transcripts returned to participants for comment and/or correction? | No                                                                                                                                                                                |
| <b>Domain 3: analysis and findings</b> |                                |                                                                          |                                                                                                                                                                                   |
| Data analysis                          |                                |                                                                          |                                                                                                                                                                                   |
| 24.                                    | Number of data coders          | How many data coders coded the data?                                     | Two coders (PN and CF) with regular validation with one of the authors (MF). The two coders are also co-author (page 5).                                                          |
| 25.                                    | Description of the coding tree | Did authors provide a description of the coding tree?                    | No                                                                                                                                                                                |
| 26.                                    | Derivation of themes           | Were themes identified in advance or derived from the data?              | The first codes were based on interview guide. Many other codes derived from the theoretical framework data following a mixed coding approach (inductive and deductive). (Page 5) |
| 27.                                    | Software                       | What software, if applicable, was used to manage the data?               | NVivo 11 (page 5)                                                                                                                                                                 |

| No        | Item                         | Guide questions/description                                                                                                              |                                                                                                                                                |
|-----------|------------------------------|------------------------------------------------------------------------------------------------------------------------------------------|------------------------------------------------------------------------------------------------------------------------------------------------|
| 28.       | Participant checking         | Did participants provide feedback on the findings?                                                                                       | Not indicated (ref. Braun, V., & Clarke, V. Using thematic analysis in psychology. <i>Qualitative Research in Psychology</i> 2016, 3: 77–101.) |
| Reporting |                              |                                                                                                                                          |                                                                                                                                                |
| 29.       | Quotations presented         | Were participant quotations presented to illustrate the themes / findings? Was each quotation identified? e.g. <i>participant number</i> | Yes. All quotes have been translated to English by a Professional Translator                                                                   |
| 30.       | Data and findings consistent | Was there consistency between the data presented and the findings?                                                                       | All findings are based on the collected and analyzed data. Major findings are consistent with the quantitative results (triangulation).        |
| 31.       | Clarity of major themes      | Were major themes clearly presented in the findings?                                                                                     | Major themes are described in the manuscript according to the theoretical framework (page 6 to 11, and appendix S4).                           |
| 32.       | Clarity of minor themes      | Is there a description of diverse cases or discussion of minor themes?                                                                   | All themes are derived from the theoretical framework and described in the manuscript (page 6 to 11, and appendix S4).                         |
