# Supplementary material for: Evaluating the implementation of interdisciplinary patient-centred care intervention for people with multimorbidity in primary care: a qualitative study
Source: PubMed Central journal article supplement — BMJ Open. 2021 Sep 24;11(9):e046914. doi: 10.1136/bmjopen-2020-046914 (PMC8475135; doi:10.1136/bmjopen-2020-046914), 2021-09-24
Supplement: bmjopen-2020-046914supp004.pdf [file bmjopen-2020-046914supp004.pdf]

Appendix S4. Key elements influencing the intervention implementation based on CFIR domains

| Domains                                                           | Barriers                                                                                                                                                                                                                | Facilitators                                                                                                                                                                                                                                            |
|-------------------------------------------------------------------|-------------------------------------------------------------------------------------------------------------------------------------------------------------------------------------------------------------------------|---------------------------------------------------------------------------------------------------------------------------------------------------------------------------------------------------------------------------------------------------------|
| <b>A. Intervention characteristics</b>                            |                                                                                                                                                                                                                         | Quotes                                                                                                                                                                                                                                                  |
| 1. Familiarity with interventions principles                      |                                                                                                                                                                                                                         | <p>Participants reported that they were already successfully applying certain principles being part of the intervention.</p> <p>Participants' prior experiences or practices in interdisciplinary collaboration, motivational approach and research</p> |
| 2. Appreciation of intervention components and relative advantage |                                                                                                                                                                                                                         | <p>Most of the participants believe the intervention was well designed and innovative. For example, healthcare professionals highly appreciated the intervention's approaches, such as the patient-centred care and motivational approaches.</p>        |
| 4. Complexity                                                     | <p>Some concepts were difficult to explain to patients and not applicable to everyone.</p> <p>It was challenging to use the motivational approach</p>                                                                   |                                                                                                                                                                                                                                                         |
| <b>B. Outer setting</b>                                           |                                                                                                                                                                                                                         |                                                                                                                                                                                                                                                         |
| 1. Health system reorganization                                   | <p>The health reform context has influenced the ordinary course of the intervention implementation, particularly in terms of coordination and monitoring.</p>                                                           |                                                                                                                                                                                                                                                         |
| <b>C. Inner setting</b>                                           |                                                                                                                                                                                                                         |                                                                                                                                                                                                                                                         |
| 1. Internal organization                                          | <p>Staff turnover/holidays and vacations</p> <p>Lack of infrastructures in some FMGs negatively impacted interprofessional collaboration and interdisciplinarity.</p>                                                   | <p>Coordination/monitoring of patient appointments</p> <p>Sharing patient records</p>                                                                                                                                                                   |
| 2. Compatibility                                                  | <p>The principles of the intervention were not compatible with the family physicians' philosophy and practice. This likely hindered interprofessional collaboration and negatively influenced physician involvement</p> | <p>the approaches advocated by the intervention such as interprofessional collaboration, motivational approach, self-management as well as the patient-centered care approach correspond to their values and vision as healthcare professionals.</p>    |
|                                                                   |                                                                                                                                                                                                                         |                                                                                                                                                                                                                                                         |

|                                          |  |                                                                                                                                                                                                                                                                                                              |
|------------------------------------------|--|--------------------------------------------------------------------------------------------------------------------------------------------------------------------------------------------------------------------------------------------------------------------------------------------------------------|
| <b>D. Characteristics of individuals</b> |  |                                                                                                                                                                                                                                                                                                              |
| 1. Leadership engagement                 |  | <p>Managers involvement and commitment have certainly facilitated the implementation of the intervention.</p> <p>The presentation and promotion of the intervention with healthcare professionals working in the FMGs, conducted jointly by a group of researchers and managers, was highly appreciated.</p> |
| <b>E. Process of implementation</b>      |  |                                                                                                                                                                                                                                                                                                              |
| 1. Communication                         |  | <p>Communication, both face-to-face and through telephone meetings, has helped maintain interaction between healthcare professionals during implementation.</p>                                                                                                                                              |
