# Supplementary material for: Evaluating the implementation of interdisciplinary patient-centred care intervention for people with multimorbidity in primary care: a qualitative study
Source: HighWire-hosted journal article supplement (doi:10.1136/bmjopen-2020-046914), 2021-09-01
Supplement: bmjopen-2020-046914supp004_data_supplement.pdf [file bmjopen-2020-046914supp004_data_supplement.pdf]

Appendix S4. Key elements influencing the intervention implementation based on CFIR domains

| Domains                                                           | Barriers                                                                                                                                                                                                         | Facilitators                                                                                                                                                                                                                                     |
|-------------------------------------------------------------------|------------------------------------------------------------------------------------------------------------------------------------------------------------------------------------------------------------------|--------------------------------------------------------------------------------------------------------------------------------------------------------------------------------------------------------------------------------------------------|
| <b>A. Intervention characteristics</b>                            |                                                                                                                                                                                                                  | Quotes                                                                                                                                                                                                                                           |
| 1. Familiarity with interventions principles                      |                                                                                                                                                                                                                  | Participants reported that they were already successfully applying certain principles being part of the intervention.<br><br>Participants' prior experiences or practices in interdisciplinary collaboration, motivational approach and research |
| 2. Appreciation of intervention components and relative advantage |                                                                                                                                                                                                                  | Most of the participants believe the intervention was well designed and innovative. For example, healthcare professionals highly appreciated the intervention's approaches, such as the patient-centred care and motivational approaches.        |
| 4. Complexity                                                     | Some concepts were difficult to explain to patients and not applicable to everyone.<br><br>It was challenging to use the motivational approach                                                                   |                                                                                                                                                                                                                                                  |
| <b>B. Outer setting</b>                                           |                                                                                                                                                                                                                  |                                                                                                                                                                                                                                                  |
| 1. Health system reorganization                                   | The health reform context has influenced the ordinary course of the intervention implementation, particularly in terms of coordination and monitoring.                                                           |                                                                                                                                                                                                                                                  |
| <b>C. Inner setting</b>                                           |                                                                                                                                                                                                                  |                                                                                                                                                                                                                                                  |
| 1. Internal organization                                          | Staff turnover/holidays and vacations<br><br>Lack of infrastructures in some FMGs negatively impacted interprofessional collaboration and interdisciplinarity.                                                   | Coordination/monitoring of patient appointments<br><br>Sharing patient records                                                                                                                                                                   |
| 2. Compatibility                                                  | The principles of the intervention were not compatible with the family physicians' philosophy and practice. This likely hindered interprofessional collaboration and negatively influenced physician involvement | the approaches advocated by the intervention such as interprofessional collaboration, motivational approach, self-management as well as the patient-centered care approach correspond to their values and vision as healthcare professionals.    |
|                                                                   |                                                                                                                                                                                                                  |                                                                                                                                                                                                                                                  |

|                                          |  |                                                                                                                                                                                                                                                                                                              |
|------------------------------------------|--|--------------------------------------------------------------------------------------------------------------------------------------------------------------------------------------------------------------------------------------------------------------------------------------------------------------|
| <b>D. Characteristics of individuals</b> |  |                                                                                                                                                                                                                                                                                                              |
| 1. Leadership engagement                 |  | <p>Managers involvement and commitment have certainly facilitated the implementation of the intervention.</p> <p>The presentation and promotion of the intervention with healthcare professionals working in the FMGs, conducted jointly by a group of researchers and managers, was highly appreciated.</p> |
| <b>E. Process of implementation</b>      |  |                                                                                                                                                                                                                                                                                                              |
| 1. Communication                         |  | <p>Communication, both face-to-face and through telephone meetings, has helped maintain interaction between healthcare professionals during implementation.</p>                                                                                                                                              |
